# Supplementary material
Source: publisher figshare collection journal article supplement (https://acs.figshare.com/ndownloader/files/5079763)

## Supporting Information

### Selective Diethylzinc Reduction of Imines in the Presence of Ketones Catalyzed by Ni(acac)<sub>2</sub>

Xue Xiao, Haowei Wang, Zhiyan Huang, Jun Yang, Xiaoxia Bian and Yong Qin\*

*Department of Chemistry of Medicinal Natural Products*

*West China School of Pharmacy, Sichuan University, Chengdu 610041, P. R. China*

*E-mail: [Yanshuqin@yahoo.com](mailto:Yanshuqin@yahoo.com).*

#### Contents of Supporting Information

Page S-1: Title of the paper, author's name and address along with the contents.

Page S-2: Contents of supporting information.

Page S-3: General methods.

Page S-3: Methods for the preparation of *tert*-Butanesulfinyl ketimines **1**.

Page S-3: General procedure for the reduction of imines **1** by Et<sub>2</sub>Zn and Ni(acac)<sub>2</sub>.

Page S-3: Characterization data of compounds **2a**.

Page S-4: Characterization data of compounds **2b** and **2c**.

Page S-5: Characterization data of compounds **2d** and **2e**.

Page S-6: Characterization data of compounds **2f** and **2g**.

Page S-7: Characterization data of compounds **2h**, **4a** and **4b**.

Page S-8: Characterization data of compounds **4c**, **4d** and **4e**.

Page S-9: Characterization data of compounds **4f**. General procedure for the selective reduction of *S<sub>S</sub>*-**1a**, *S<sub>S</sub>*-**1h** and **3b** by Et<sub>2</sub>Zn and Ni(acac)<sub>2</sub> in the presence of ketone **5** or **7**.

Page S-10: Mechanism study of the reduction reaction and References.

Page S-12: HPLC spectra of selective reduction of *S<sub>S</sub>*-**1a** by Et<sub>2</sub>Zn and Ni(acac)<sub>2</sub> in the presence of ketone **5**.

Page S-13: GC spectra of selective reduction of *S<sub>S</sub>*-**1h** by Et<sub>2</sub>Zn and Ni(acac)<sub>2</sub> in the

presence of ketone **7**.

Page S-14: HPLC spectra of selective reduction of **3b** by Et<sub>2</sub>Zn and Ni(acac)<sub>2</sub> in the presence of ketone **5**.

Page S-15: <sup>1</sup>H NMR spectrum of compounds **2b** and <sup>13</sup>C NMR spectrum of compounds **2b**.

Page S-16: <sup>1</sup>H NMR spectrum of compounds **2e** and <sup>13</sup>C NMR spectrum of compounds **2e**.

Page S-17: <sup>1</sup>H NMR spectrum of compounds **2f** and <sup>13</sup>C NMR spectrum of compounds **2f**.

Page S-18: <sup>1</sup>H NMR spectrum of compounds **4d** and <sup>13</sup>C NMR spectrum of compounds **4d**.

Page S-19: <sup>1</sup>H NMR spectrum of compounds **4e** and <sup>13</sup>C NMR spectrum of compounds **4e**.

Page S-20: <sup>1</sup>H NMR spectrum of compounds **4f** and <sup>13</sup>C NMR spectrum of compounds **4f**.

### General methods.

All reagents were purchased from commercial suppliers and used without further purification. Solvents were dried according to standard procedures. The dr value of the reduction products were determined by HPLC and  $^1\text{H}$  NMR. Chromatography refers to flash chromatography on silica gel (300–400 mesh). Thin-layer chromatography (TLC) was performed on glass plates silica gel sheets (SilicaGel F254) and visualised under UV light or colored in  $\text{I}_2$ .

*tert*-Butanesulfinyl ketimines **1** were prepared according to the literature procedure<sup>1</sup>

### General procedure for the reduction of imines **1** by $\text{Et}_2\text{Zn}$ and $\text{Ni}(\text{acac})_2$ .

Under  $\text{N}_2$ , to a 5 mL solution of imine **1** (0.5 mmol) in dioxane was injected diethylzinc (1.5 mmol, 1.1 M in toluene), followed by adding a solution of  $\text{Ni}(\text{acac})_2$  (0.025 mmol) in 0.5 ml dioxane. The mixture was stirred at room temperature for a certain time indicated in Table 1, Table 2 and Table 3 and was monitored by thin-layer chromatography. The reaction mixture was quenched by adding saturated aq.  $\text{NH}_4\text{Cl}$  (10 mL). The aqueous layer was extracted twice with  $\text{CH}_2\text{Cl}_2$  (3 X 10 mL). The combined organic layers were dried over  $\text{Na}_2\text{SO}_4$ . After removing the solvent, the residue was directly subjected to HPLC or  $^1\text{H}$  NMR analysis to determine the dr value. The residue was then purified by column chromatography to afford sulfonamide **2**. The chromatography fractions containing major isomer were collected and used to measure the rotation after removing the *tert*-butanesulfinyl group by 6 N HCl. The absolute configuration of major isomer of resulting amine was determined by comparison of its rotation with the data of known amine.

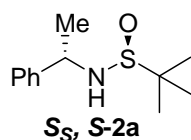

(*Ss, S*)-*N*-(*tert*-Butanesulfinyl) 1-phenylethylamine **2a**.<sup>2</sup> Purified by flash chromatography on silica gel (ethyl acetate/petroleum 1:4). Colorless oil. The

diastereomeric ratio was determined by HPLC analysis (DIKAMA Inertsil SIL-100A column; 90:10 hexanes/IPA, 0.8 ml/min, 227 nm;  $t_R$  = 7.6 min (major), 9.5 min (minor)).  $^1\text{H}$  NMR (400 MHz,  $\text{CDCl}_3$ )  $\delta$  1.24 (s, 9H), 1.51 (d,  $J$  = 8 Hz, 3H), 3.42 (b, 1H), 4.52-4.58 (m, 1H), 7.25-7.33 (m, 5H) ppm. The chromatography fractions containing major isomer were collected and used to measure the rotation after removing the *tert*-butanesulfinyl group. (*S*)-1-Phenylethylamine hydrochloride  $[\alpha]_D^{23}$   $-3.0^\circ$  (c 2.8, MeOH) (lit.<sup>7</sup>  $[\alpha]_D^{23}$   $-4.6^\circ$  (c 4.0, MeOH)).

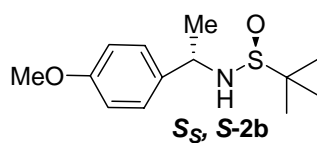

(*Ss, S*)-*N*-(*tert*-butanesulfinyl) 1-(4'-methoxyphenyl)ethylamine **2b**. Purified by flash chromatography on silica gel (ethyl acetate/petroleum 1:4). Colorless oil. The diastereomeric ratio was determined by HPLC analysis (DIKAMA Inertsil SIL-100A column; 93:7 hexanes/IPA, 0.8 ml/min, 227 nm;  $t_R$  = 12.0 min (major), 14.5 min (minor)).  $^1\text{H}$  NMR (400 MHz,  $\text{CDCl}_3$ )  $\delta$  1.23 (s, 9H), 1.48 (d,  $J$  = 6.4 Hz, 3H), 3.37 (d,  $J$  = 1.6 Hz, 1H), 3.8 (s, 3H), 4.50-4.52 (m, 1H), 6.86-6.90 (m, 2H), 7.26-7.29 (m, 2H) ppm;  $^{13}\text{C}$  NMR (100 MHz,  $\text{CDCl}_3$ )  $\delta$  22.6, 22.8, 53.4, 55.3, 55.4, 114.1, 127.8, 136.3, 159.2 ppm; IR (film) 1039, 1247, 1513, 2968, 3217  $\text{cm}^{-1}$ ; HRMS: calcd for  $\text{C}_{13}\text{H}_{21}\text{NO}_2\text{SNa}$  ( $\text{M}+\text{Na}$ )<sup>+</sup> 278.1185. Found 278.1177. The chromatography fractions containing major isomer were collected and used to measure the rotation after removing the *tert*-butanesulfinyl group. (*S*)-1-(4'-Methoxyphenyl)ethylamine  $[\alpha]_D^{22}$   $-32^\circ$  (c 1.0, MeOH) (lit.<sup>8</sup>  $[\alpha]_D^{22}$   $-28^\circ$  (c 3.2, MeOH)).

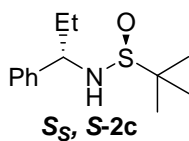

(*Ss, S*)-*N*-(*tert*-Butanesulfinyl) 1-phenylpropylamine **2c**<sup>2</sup>. Purified by flash chromatography on silica gel (ethyl acetate/petroleum 1:3). Colorless oil. The diastereomeric ratio was determined by HPLC analysis (DIKAMA Inertsil SIL-100A

column; 93:7 hexanes/IPA, 0.8 ml/min, 227 nm;  $t_R$  = 8.2 min (major), 10.1 min (minor)).  $^1\text{H}$  NMR (400 MHz,  $\text{CDCl}_3$ )  $\delta$  0.80 (t,  $J$  = 7.6 Hz, 3H), 1.23 (s, 9H), 1.70-1.82 (m, 1H), 2.00-2.10 (m, 1H), 3.39 (br, 1H), 4.26-4.30 (m, 1H), 7.27-7.37 (m, 5H) ppm. The chromatography fractions containing major isomer were collected and used to measure the rotation after removing the *tert*-butanesulfinyl group. (*S*)-1-Phenylpropylamine  $[\alpha]_D^{23}$  -14.9°(c 1.0,  $\text{CHCl}_3$ ) (lit.<sup>9</sup>  $[\alpha]_D^{23}$  -36.6°(c 1.0,  $\text{CHCl}_3$ )).

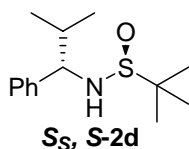

(*Ss, S*)-*N*-(*tert*-Butanesulfinyl) 2-methyl-1-phenylpropylamine **2d**<sup>2</sup>. Purified by flash chromatography on silica gel (ethyl acetate/petroleum 1:4). White solid. The diastereomeric ratio was determined by  $^1\text{H}$  NMR ( $\delta$  2.23 (major), 1.98 (minor)).  $^1\text{H}$  NMR (400 MHz,  $\text{CDCl}_3$ )  $\delta$  0.80 (d,  $J$  = 6.8 Hz, 3H), 0.93 (d,  $J$  = 6.8 Hz, 3H), 1.25 (s, 9H), 2.19-2.27 (m, 1H), 3.45 (br, 1H), 4.17 (d,  $J$  = 5.4 Hz, 1H), 7.24-7.35 (m, 5H) ppm. The chromatography fractions containing major isomer were collected and used to measure the rotation after removing the *tert*-butanesulfinyl group. (*S*)-2-Methyl-1-phenylpropylamine  $[\alpha]_D^{23}$  -10.8°(c 1.0,  $\text{CHCl}_3$ ) (lit.<sup>10</sup>  $[\alpha]_D^{23}$  -11.5°(c 1.0,  $\text{CHCl}_3$ )).

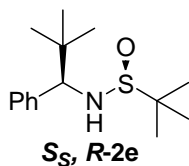

(*Ss, R*)-*N*-(*tert*-Butanesulfinyl) 2,2-dimethyl-1-phenylpropylamine **2e**. Purified by flash chromatography on silica gel (ethyl acetate/petroleum 1:4). White solid. The diastereomeric ratio was determined by HPLC analysis (DIKAMA Inertsil SIL-100A column; 95:5 hexanes/IPA, 1 ml/min, 227 nm;  $t_R$  = 6.7 min (minor), 7.5 min (major)).  $^1\text{H}$  NMR (400 MHz,  $\text{CDCl}_3$ )  $\delta$  0.95 (s, 9H), 1.21 (s, 9H), 3.60 (b, 1H), 4.14 (d,  $J$  = 2.0 Hz, 1H), 7.24-7.31 (m, 5H) ppm;  $^{13}\text{C}$  NMR (100 MHz,  $\text{CDCl}_3$ )  $\delta$  22.6, 26.7, 35.2, 55.5, 67.2, 127.5, 128.1, 129.5, 139.2 ppm; IR (KBr) 1067, 2956, 3338  $\text{cm}^{-1}$ ; HRMS: calcd

for  $C_{15}H_{25}NOSNa$  ( $M+Na$ )<sup>+</sup> 290.1549. Found 290.1561. The chromatography fractions containing major isomer were collected and used to measure the rotation after removing the *tert*-butanesulfinyl group. (*R*)-2,2-Dimethyl-1-phenylpropylamine [ $\alpha$ ]<sub>D</sub><sup>23</sup> +3.3°(c 1.0, CHCl<sub>3</sub>) (lit.<sup>10</sup> [ $\alpha$ ]<sub>D</sub> -5.5°(c 1.0, CHCl<sub>3</sub>) for *S* configuration amine).

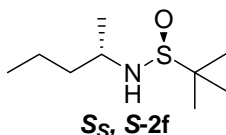

(*Ss*, *S*)-*N*-(*tert*-Butanesulfinyl) 1-methylbutylamine **2f**. Purified by flash chromatography on silica gel (ethyl acetate/petroleum 1:2). Colorless oil. The diastereomeric ratio was determined by HPLC analysis (DIKAMA Inertsil SIL-100A column; 98:2 hexanes/IPA, 1.5 ml/min, 227 nm;  $t_R$  = 13.0 min (major), 15.7 min (minor)). <sup>1</sup>H NMR (400 MHz, CDCl<sub>3</sub>)  $\delta$  0.93 (t,  $J$  = 7.2 Hz, 3H), 1.16 (d,  $J$  = 6.4 Hz, 3H), 1.20 (s, 9H), 1.33-1.46 (m, 2H), 1.51-1.60 (m, 2H), 3.04 (b, 1H), 3.34-3.42 (m, 1H) ppm; <sup>13</sup>C NMR (50 MHz, CDCl<sub>3</sub>)  $\delta$  13.6, 18.9, 21.3, 22.4, 40.5, 50.9, 55.1 ppm; IR (film) 1055, 1458, 2959, 3215 cm<sup>-1</sup>; HRMS: calcd for  $C_9H_{21}NOSNa$  ( $M+Na$ )<sup>+</sup> 214.1236. Found 214.1228. The chromatography fractions containing major isomer were collected and used to measure the rotation after removing the *tert*-butanesulfinyl group. (*S*)-1-Methylbutylamine hydrochloride [ $\alpha$ ]<sub>D</sub><sup>24</sup> -1.8°(c 1.7, EtOH) (lit.<sup>11</sup> [ $\alpha$ ]<sub>D</sub><sup>24</sup> +7.2°(c 2.3, EtOH) for *R* configuration amine hydrochloride).

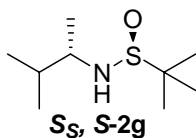

(*Ss*, *S*)-*N*-(*tert*-Butanesulfinyl) 1,2-dimethyl-propylamine **2g**<sup>2</sup>. Purified by flash chromatography on silica gel (ethyl acetate/petroleum 1:2). Colorless oil. Crude The diastereomeric ratio was determined by <sup>1</sup>H NMR ( $\delta$  3.11 (major), 2.81 (minor)). <sup>1</sup>H NMR (400 MHz, CDCl<sub>3</sub>)  $\delta$  0.92 (t,  $J$  = 6.8 Hz, 6H), 1.09 (d,  $J$  = 6.4 Hz, 3H), 1.21 (s, 9H), 1.73-1.79 (m, 1H), 3.11 (b, 1H), 3.25-3.30 (m, 1H) ppm. The chromatography fractions containing major isomer were collected and used to measure the rotation after

removing the *tert*-butanesulfinyl group. (*S*)-1,2-Dimethylpropylamine hydrochloride  $[\alpha]_D^{23} -1.1^\circ$  (c 1.2, MeOH) (lit.<sup>12</sup>  $[\alpha]_D^{23} -2.16^\circ$  (c 4.0, MeOH)).

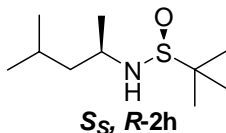

(*Ss, R*)-*N*-(*tert*-Butanesulfinyl) 1,3-dimethyl-butylamine **2h**<sup>3</sup>. Purified by flash chromatography on silica gel (ethyl acetate/petroleum 1:2). White crystals. The diastereomeric ratio was determined by HPLC analysis (DIKAMA Inertsil SIL-100A column; 95:5 hexanes/IPA, 1 ml/min, 227 nm;  $t_R$  = 7.5 min (major), 8.7 min (minor)). <sup>1</sup>H NMR (400 MHz, CDCl<sub>3</sub>)  $\delta$  0.91 (dd,  $J$  = 6.8, 8 Hz, 6H), 1.16 (d,  $J$  = 6.4 Hz, 3H), 1.20 (s, 9H), 1.27-1.35 (m, 1H), 1.41-1.48 (m, 1H), 1.67-1.74 (m, 1H), 3.01 (b, 1H), 3.38-3.50 (m, 1H) ppm. The chromatography fractions containing major isomer were collected and used to measure the rotation after removing the *tert*-butanesulfinyl group. (*R*)-1,3-Dimethylbutylamine hydrochloride  $[\alpha]_D^{25} -3.5^\circ$  (c 1.0, MeOH) (lit.<sup>13</sup>  $[\alpha]_D^{25} +3.7^\circ$  (c 1.0, MeOH) for *S* configuration amine hydrochloride).

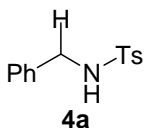

*N*-Ts Benzylamine **4a**<sup>4</sup>. Purified by flash chromatography on silica gel (ethyl acetate/petroleum 1:7). White solid. <sup>1</sup>H NMR (400 MHz, CDCl<sub>3</sub>)  $\delta$  2.44 (s, 3H), 4.12 (d,  $J$  = 6.4 Hz, 2H), 4.64 (s, 1H), 7.10-7.21 (m, 2H), 7.26-7.32 (m, 5H), 7.76 (d,  $J$  = 8 Hz, 2H) ppm.

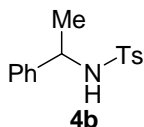

*N*-Ts Methylbenzylamine **4b**<sup>5</sup>. Purified by flash chromatography on silica gel (ethyl acetate/petroleum 1:8). Yellow solid. <sup>1</sup>H NMR (400 MHz, CDCl<sub>3</sub>)  $\delta$  1.42 (d,  $J$  = 6.8 Hz, 3H), 2.39 (s, 3H), 4.42-4.48 (m, 1H), 4.19 (d,  $J$  = 6.8 Hz, 1H), 7.09-7.11 (m, 2H),

7.17-7.21 (m, 5H), 7.61 (d,  $J = 8.4$  Hz, 2H) ppm.

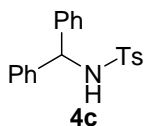

**N-Ts Phenylbenzylamine 4c**<sup>6</sup>. Purified by flash chromatography on silica gel (ethyl acetate/petroleum 1:10). White solid. <sup>1</sup>H NMR (400 MHz, CDCl<sub>3</sub>)  $\delta$  2.29 (s, 3H), 5.00 (d,  $J = 6.8$  Hz, 1H), 5.48 (d,  $J = 6.8$  Hz, 1H), 7.00-7.06 (m, 6H), 7.11-7.17 (m, 6H), 7.47 (d,  $J = 8.4$  Hz, 2H) ppm.

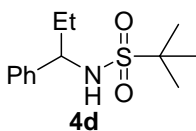

**N-(tert-Butanesulfonyl) ethylbenzylamine 4d**. Purified by flash chromatography on silica gel (ethyl acetate/petroleum 1:9). White solid. mp 86-87 °C; <sup>1</sup>H NMR (400 MHz, CDCl<sub>3</sub>)  $\delta$  0.82 (t,  $J = 7.6$  Hz, 3H), 1.18 (s, 9H), 1.71-1.81 (m, 2H), 4.30 (b, 1H), 4.31 (b, 1H), 7.14-7.20 (m, 3H), 7.24-7.28 (m, 2H) ppm. <sup>13</sup>C NMR (50 MHz, CDCl<sub>3</sub>)  $\delta$  10.7, 24.1, 32.5, 59.6, 60.4, 126.4, 127.3, 128.6, 142.5 ppm; IR (KBr) 1121, 1293, 2970, 3285 cm<sup>-1</sup>; HRMS: calcd for C<sub>13</sub>H<sub>21</sub>NO<sub>2</sub>SNa (M+Na)<sup>+</sup> 278.1185. Found 278.1198.

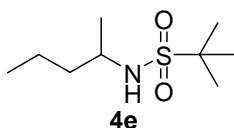

**N-(tert-Butanesulfonyl) methylbutylamine 4e**. Purified by flash chromatography on silica gel (ethyl acetate/petroleum 1:8). Colorless oil. <sup>1</sup>H NMR (400 MHz, CDCl<sub>3</sub>)  $\delta$  0.93 (t,  $J = 7.2$  Hz, 3H), 1.24 (d,  $J = 6.4$  Hz, 3H), 1.34-1.57 (m, 4H), 1.41 (s, 9H), 3.45-3.52 (m, 1H), 3.64 (b, 1H) ppm. <sup>13</sup>C NMR (100 MHz, CDCl<sub>3</sub>)  $\delta$  13.8, 19.2, 22.7, 24.2, 40.7, 51.2, 59.5 ppm; IR (film) 1125, 1301, 2964, 3281 cm<sup>-1</sup>; HRMS: calcd for C<sub>9</sub>H<sub>21</sub>NO<sub>2</sub>SNa (M+Na)<sup>+</sup> 230.1185. Found 230.1181.



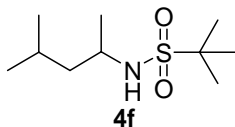

***N*-(*tert*-Butanesulfonyl) 1,3-dimethyl-butylamine 4f.** Purified by flash chromatography on silica gel (ethyl acetate/petroleum 1:9). White solid. mp 77-78°C; <sup>1</sup>H NMR (400 MHz, CDCl<sub>3</sub>) δ 0.92 (dd, *J* = 6.8 Hz, 12.4 Hz, 6H), 1.24 (d, *J* = 6.0 Hz, 3H), 1.27-1.33 (m, 1H), 1.39 (s, 9H), 1.42-1.48 (m, 1H), 1.66-1.74 (m, 1H), 3.52 (b, 1H), 3.54 (b, 1H) ppm; <sup>13</sup>C NMR (50 MHz, CDCl<sub>3</sub>) δ 22.1, 22.6, 23.1, 24.2, 24.6, 48.1, 49.6, 59.5 ppm; IR (KBr) 1116, 1298, 2971, 3281 cm<sup>-1</sup>; HRMS: calcd for C<sub>10</sub>H<sub>23</sub>NO<sub>2</sub>SNa (M+Na)<sup>+</sup> 244.1342. Found 244.1333.

**General procedure for the selective reduction of imines *S*<sub>S</sub>-1a, *S*<sub>S</sub>-1h and 3b by Et<sub>2</sub>Zn and Ni(acac)<sub>2</sub> in the presence of ketone 5 or 7.**

Under N<sub>2</sub>, to a 5 mL solution of imine (0.5 mmol) and ketone (0.5 mmol) in dioxane was injected diethylzinc (1.5 mmol, 1.1 M in toluene), followed by adding a solution of Ni(acac)<sub>2</sub> (0.025 mmol) in 0.5 ml dioxane. The mixture was stirred at room temperature for 1 h. The reaction mixture was quenched by adding saturated aq. NH<sub>4</sub>Cl (10 mL). The aqueous layer was extracted with ether (3 X 10 mL). The combined organic layers were washed with 1 N HCl (5 mL) and were dried over Na<sub>2</sub>SO<sub>4</sub>. The unchanged ketones **5** and **7** were easily detected by TLC analysis. For the reduction of ***S*<sub>S</sub>-1h**, the ether was evaporated under 1 atm pressure to give a dioxane solution, which was used for GC analysis. For the reduction of ***S*<sub>S</sub>-1a** and **3b**, the ether and dioxane were evaporated under 1 atm pressure to give a residue, which was used for HPLC analysis. GC condition: Fuli 9790 instrument with a SE-30 column (Restec, 25m x 0.23mm), T<sub>inj</sub> = 240°C, T<sub>det</sub> = 260°C, T<sub>column</sub> = 60°C hold 5 min, then 15°C/min, t<sub>R</sub> = 3.8 min (ketone **7**), 4.2 min (alcohol **8**), 14.2 min (amide ***S*<sub>S</sub>-2h**). HPLC condition: DIKAMA Inertsil SIL-100A column, 90:10 hexanes/IPA, 0.8 ml/min, 210 nm, t<sub>R</sub> = 5.4 min (ketone **5**), 6.6 min (alcohol **6**), 7.6 min (amide ***S*<sub>S</sub>-2a**); DIKAMA Inertsil SIL-100A column, gradual eluting with hexanes/IPA from 97:3 (1-8 min) to 90:10 (9-11 min), 1 ml/min, 210nm, t<sub>R</sub> = 4.8 min (ketone **5**), 6.8 min (amide **3b**), 8.9 min

(alcohol **6**); The residue was purified by column chromatography to afford amide **2**.

### Mechanism study of the reduction reaction.

Under N<sub>2</sub>, to a solution of *S*<sub>5</sub>-**1c** (0.05 mmol) in toluene-d<sub>8</sub> (1 mL) in a NMR tube was injected diethylzinc (0.15 mL, 1.0 M in hexane). Two <sup>1</sup>H NMR spectra were recorded at the time right after adding diethylzinc and at 2 h respectively before Ni(acac)<sub>2</sub> was added. After adding a solution of Ni(acac)<sub>2</sub> (0.0025 mmol) in 0.1 mL of toluene-d<sub>8</sub>, The <sup>1</sup>H NMR spectra were recorded again at a different time indicated in Figure 4 until **1c** was consumed. Part of those <sup>1</sup>H NMR spectra between 2.0 ppm and 6.0 ppm were compiled in Figure 4.

### Reference:

- (1) Liu, G.; Cogan, D. A.; Owens, T. D.; Tang, T. P.; Ellman, J. A. *J. Org. Chem.* **1999**, *64*, 1278.
- (2) Cogan, D. A.; Liu, G.; Ellman, J. A. *Tetrahedron* **1999**, *55*, 8883.
- (3) Borg, G.; Cogan, D. A.; Ellman, J. A. *Tetrahedron Lett.* **1999**, *40*, 6709.
- (4) Flynn, D. L.; Crich, J. Z.; Devraj, R. V.; Hockerman, S. L.; Parlow, J. J.; South, M. S.; Woodard, S. *J. Am. Chem. Soc.* **1999**, *119*, 4874.
- (5) Sisko, J.; Weinreb, S. M. *J. Org. Chem.* **1990**, *55*, 393.
- (6) Ueda, M.; Miyaura, N. *J. Organomet. Chem.* **2000**, *595*, 31.
- (7) Rangaishenvi, M. V.; Singaram, B.; Brown, H. C. *J. Org. Chem.* **1991**, *56*, 3286.
- (8) Bernhard, H. O.; Kompis, I.; Johne, S.; Groger, D.; Hesse, M.; Schmid, H. *Helv. Chim. Acta.* **1973**, *56*, 1266.
- (9) Buckley III, T. F.; Rappoport, H. *J. Am. Chem. Soc.* **1981**, *103*, 6157.
- (10) Yang, T.-K.; Chen, R.-Y.; Lee, D.-S.; Peng, W.-S.; Jiang, Y.-Z.; Mi, A.-Q.; Jong, T.-T. *J. Org. Chem.* **1994**, *59*, 914.
- (11) *Dictionary of Organic Compounds*; Chapman and Hall Pub.: London, **1996**; Vol. 5, p 5138.
- (12) Wu, M.-J.; Pridgen, L. N. *J. Org. Chem.* **1991**, *56*, 1340.
- (13) Andres, C.; Nieto, J.; Pedrosa, R.; Villamanan, N. *J. Org. Chem.* **1996**, *61* 4130.



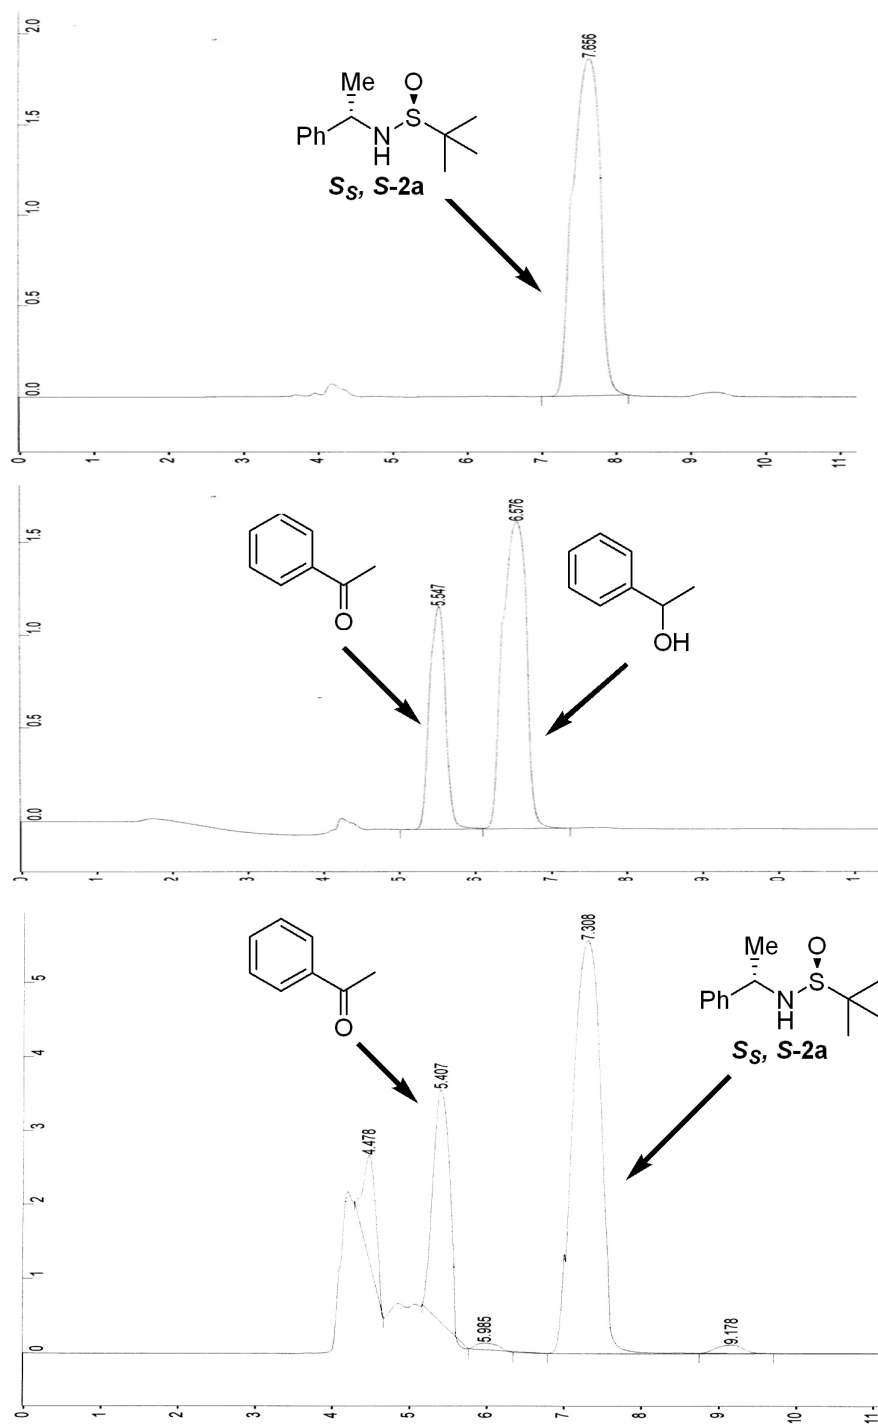

HPLC analysis of selective reduction of **S<sub>S</sub>-1a** by Et<sub>2</sub>Zn and Ni(acac)<sub>2</sub> in the presence of ketone **5**.

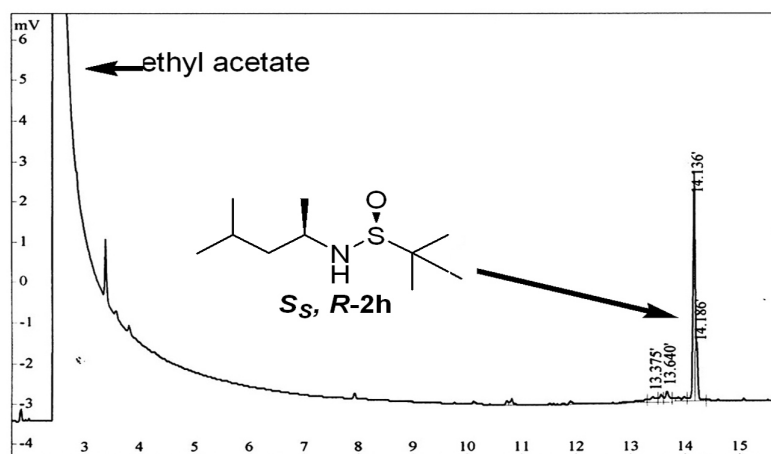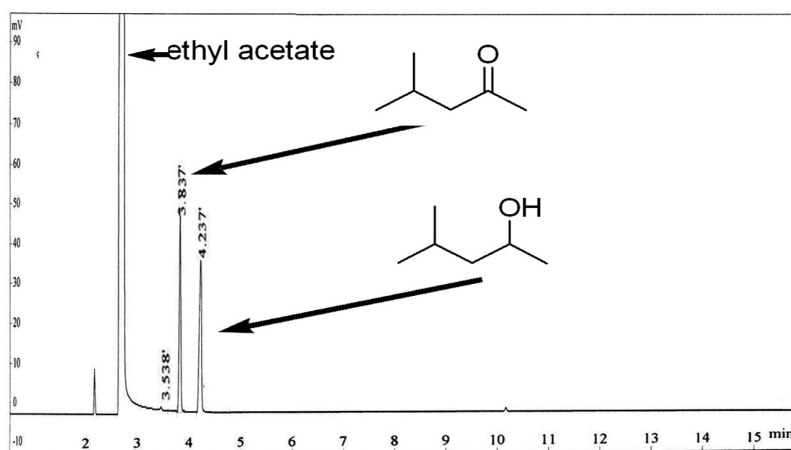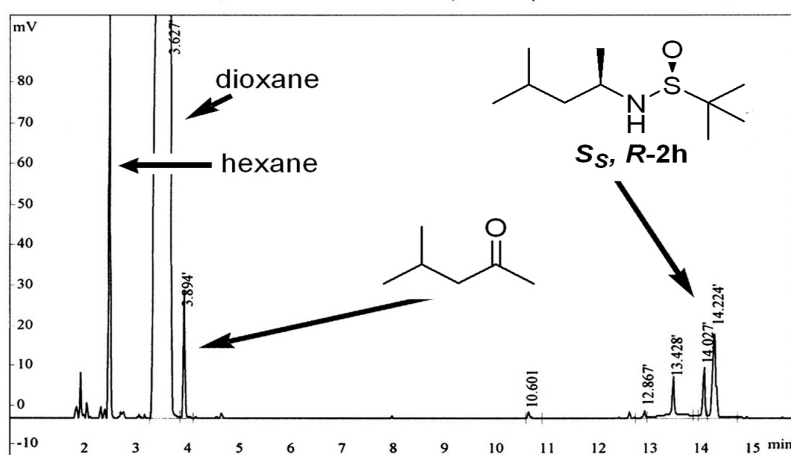

GC analysis of selective reduction of  $S_S-1h$  by  $Et_2Zn$  and  $Ni(acac)_2$  in the presence of ketone **7**.

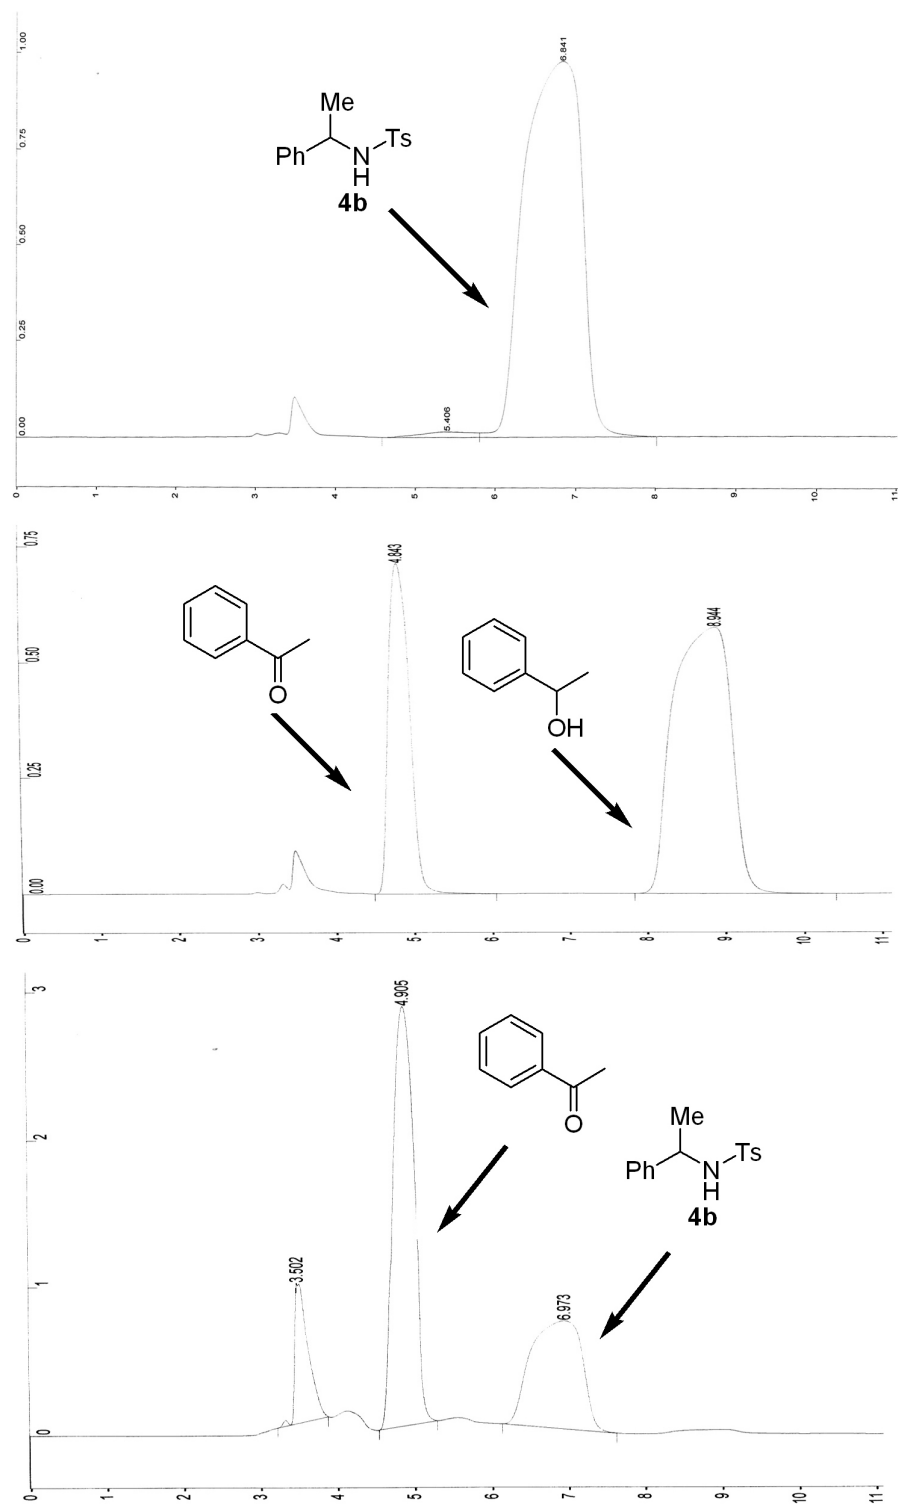

HPLC analysis of selective reduction of **3b** by  $\text{Et}_2\text{Zn}$  and  $\text{Ni}(\text{acac})_2$  in the presence of ketone **5**.

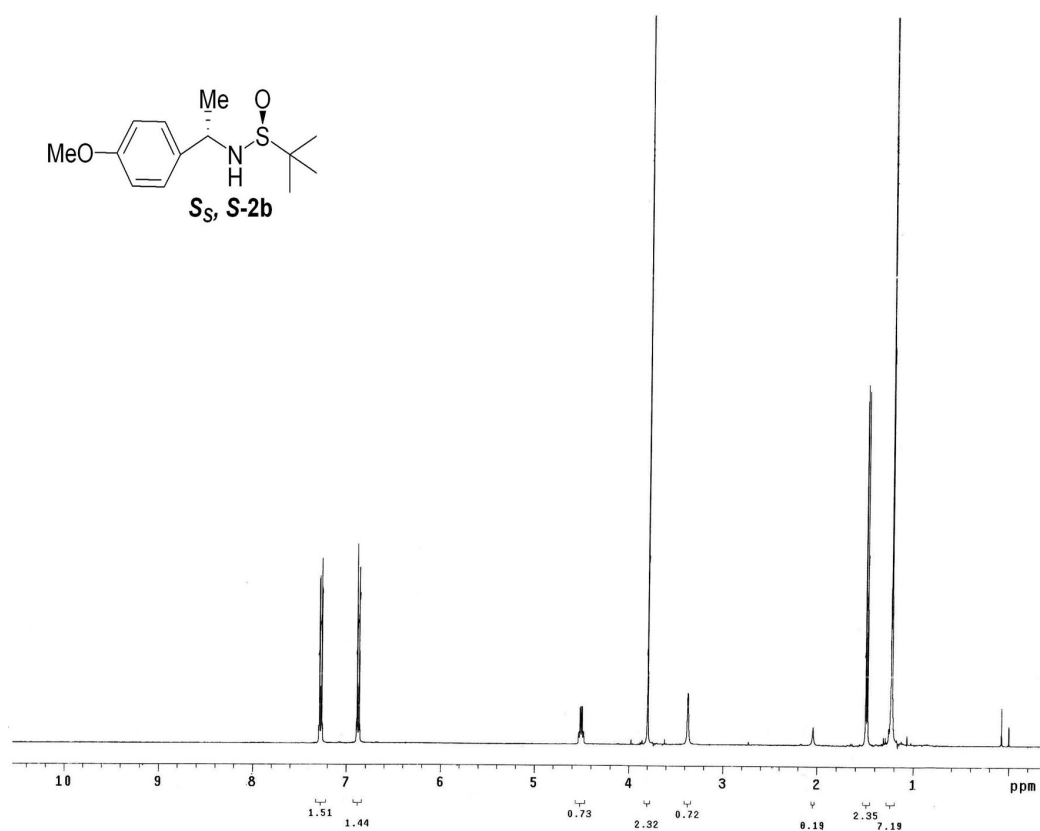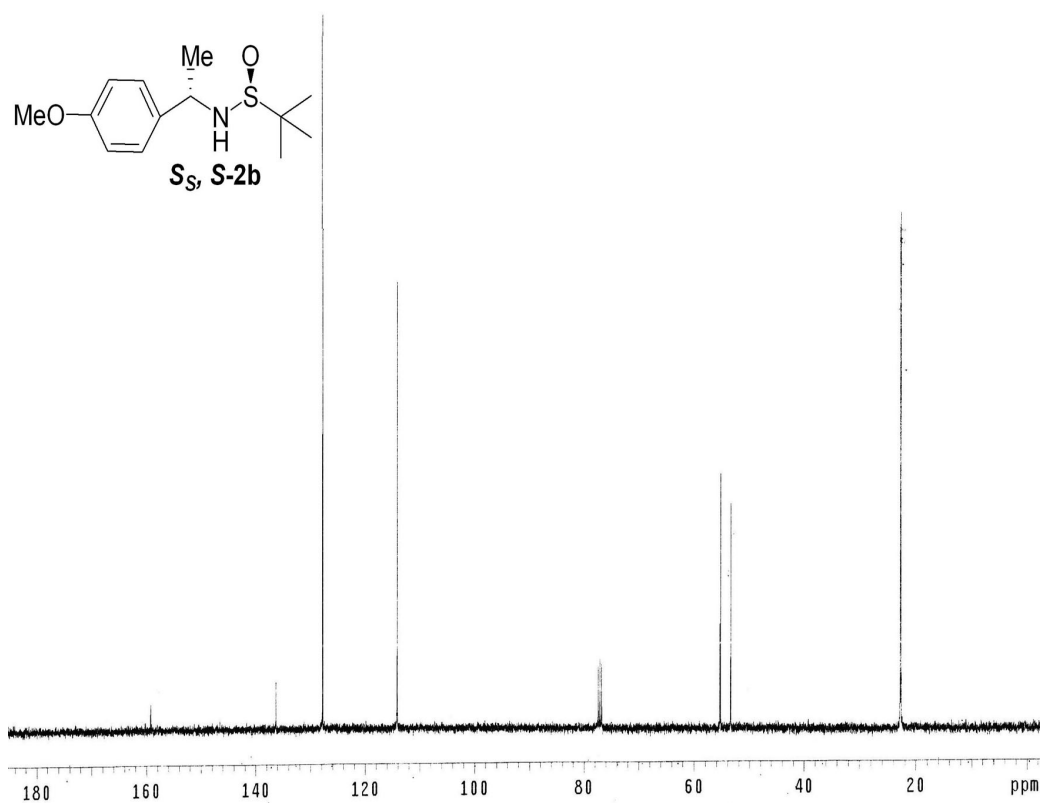

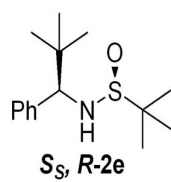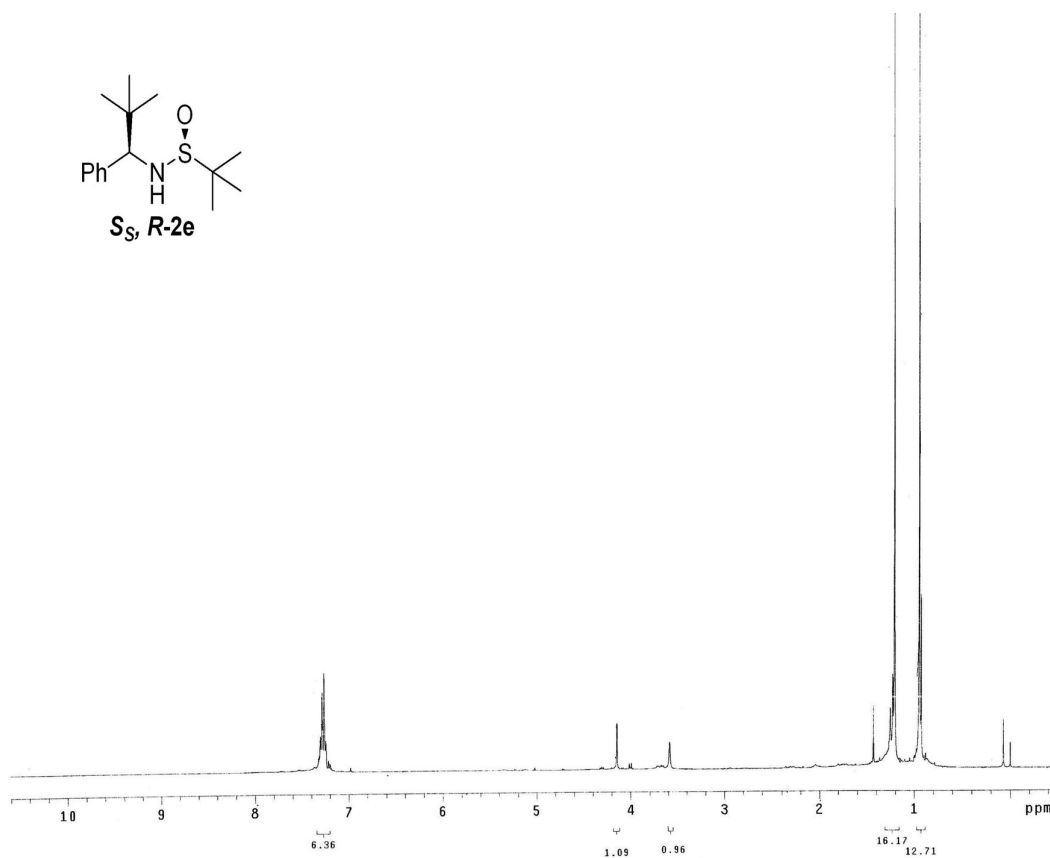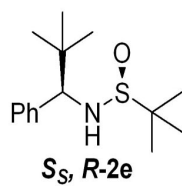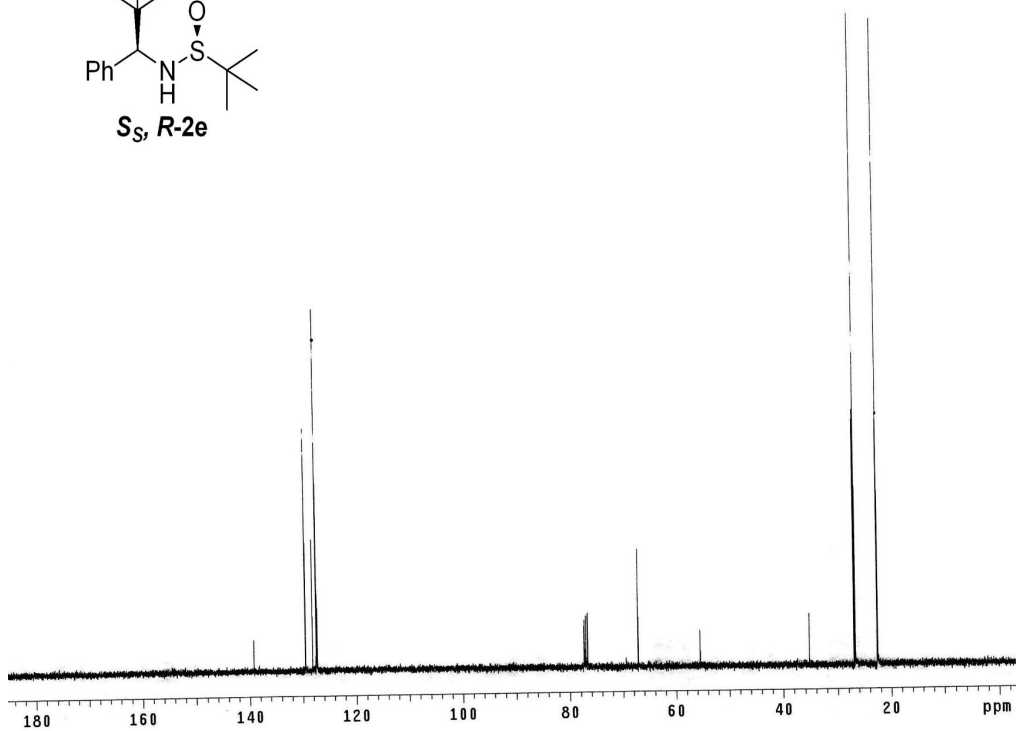



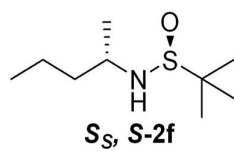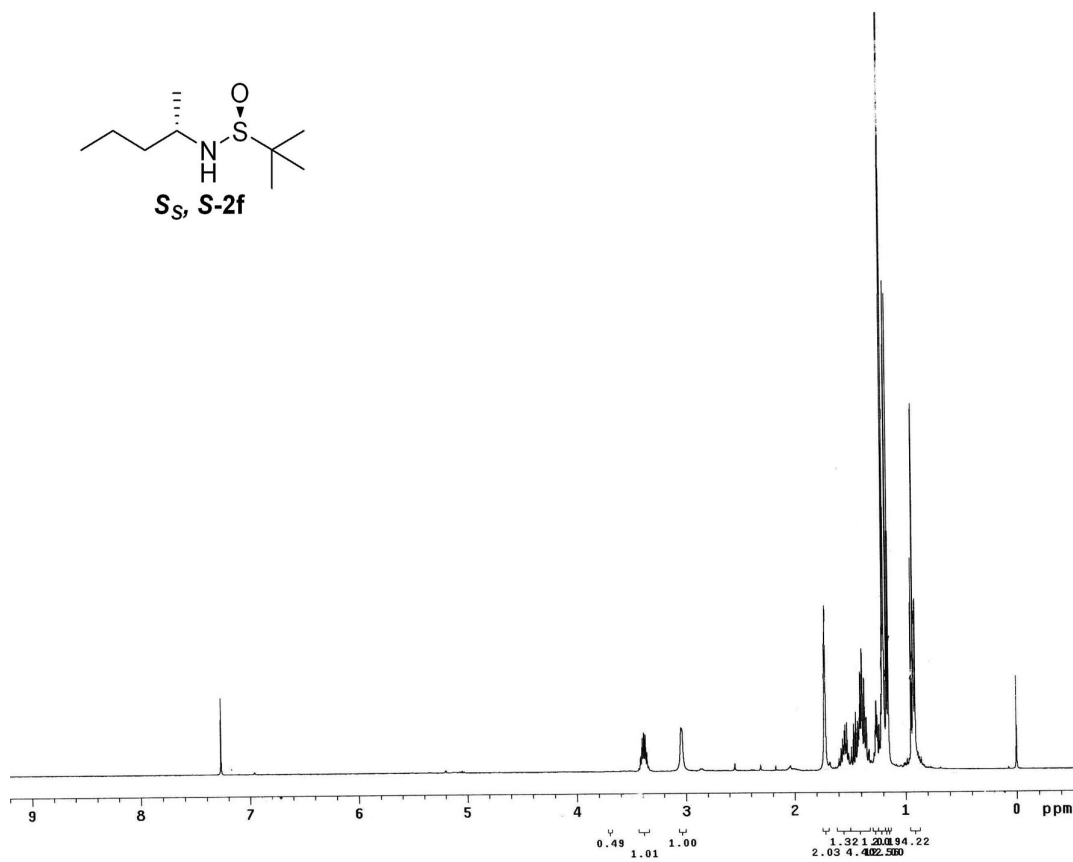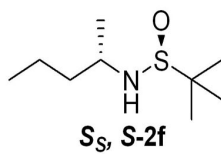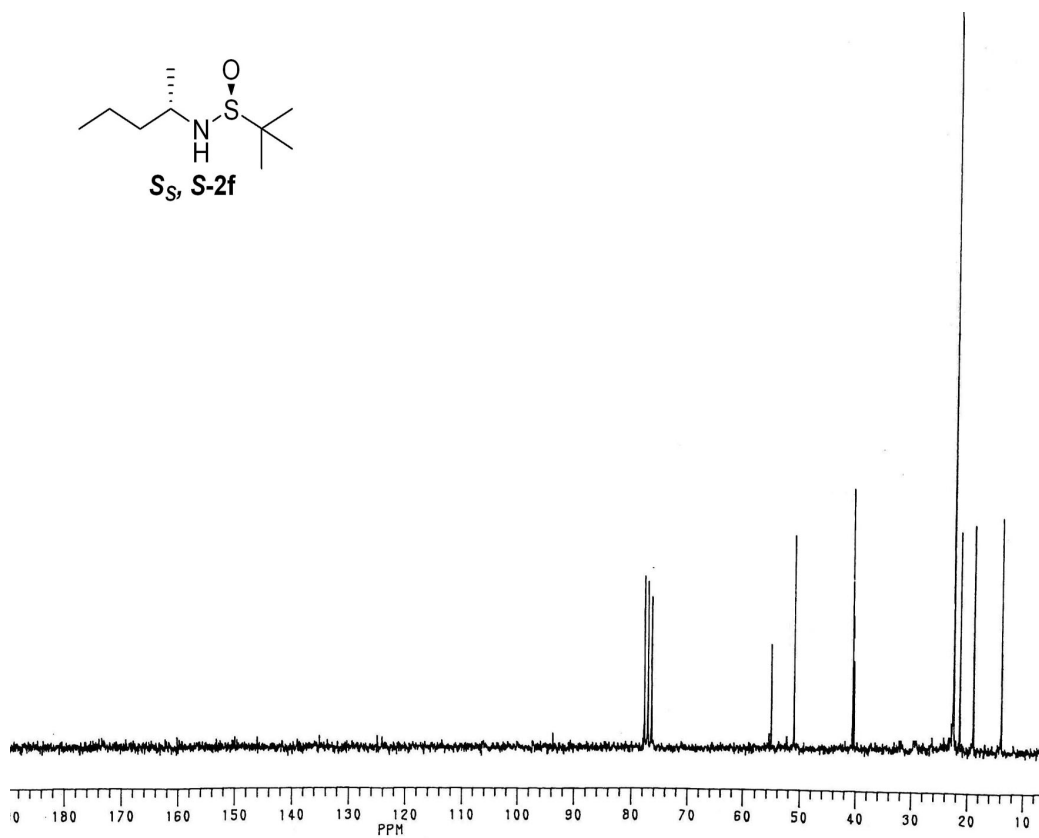

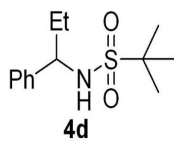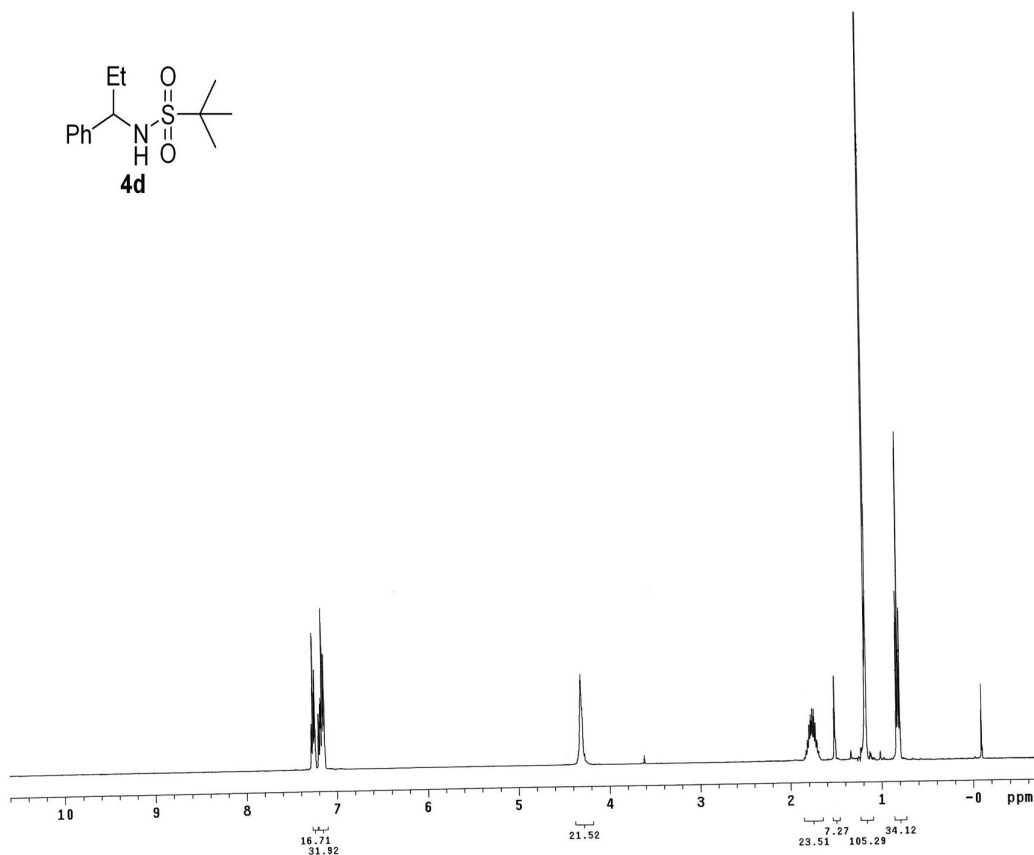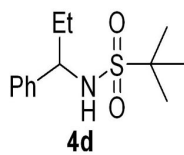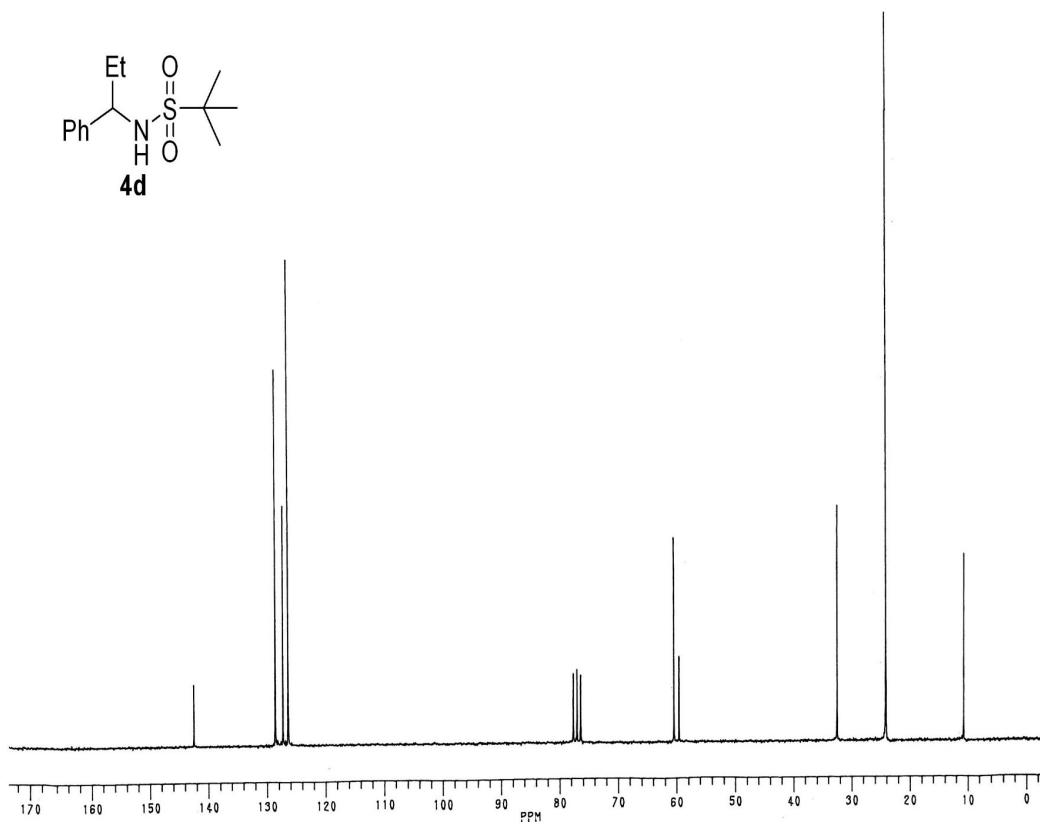

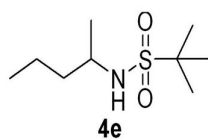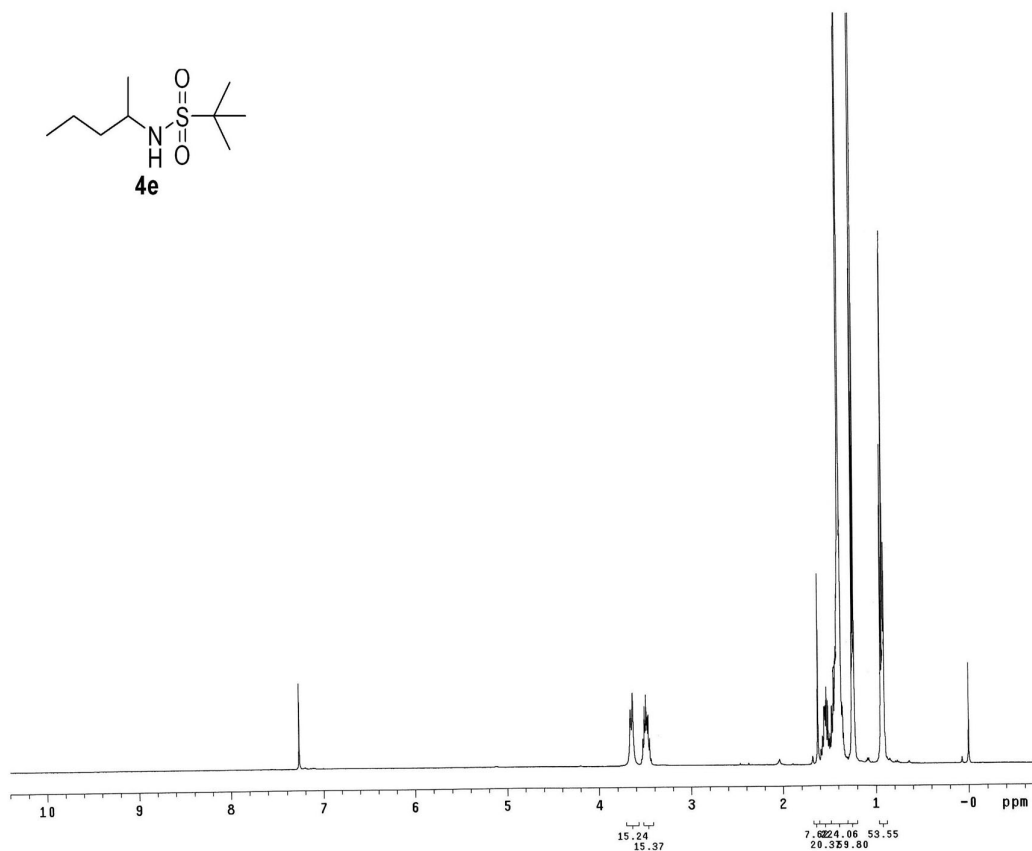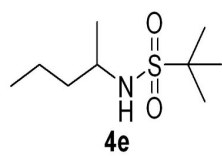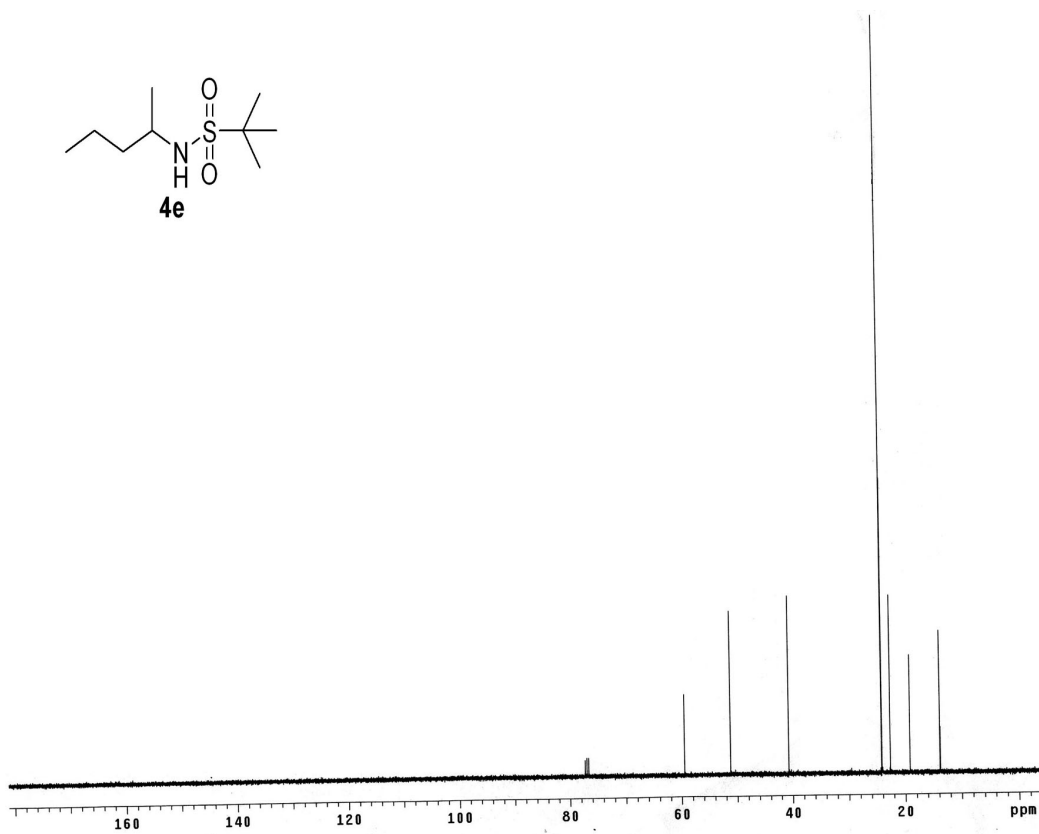

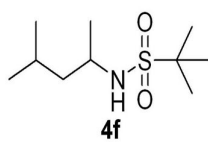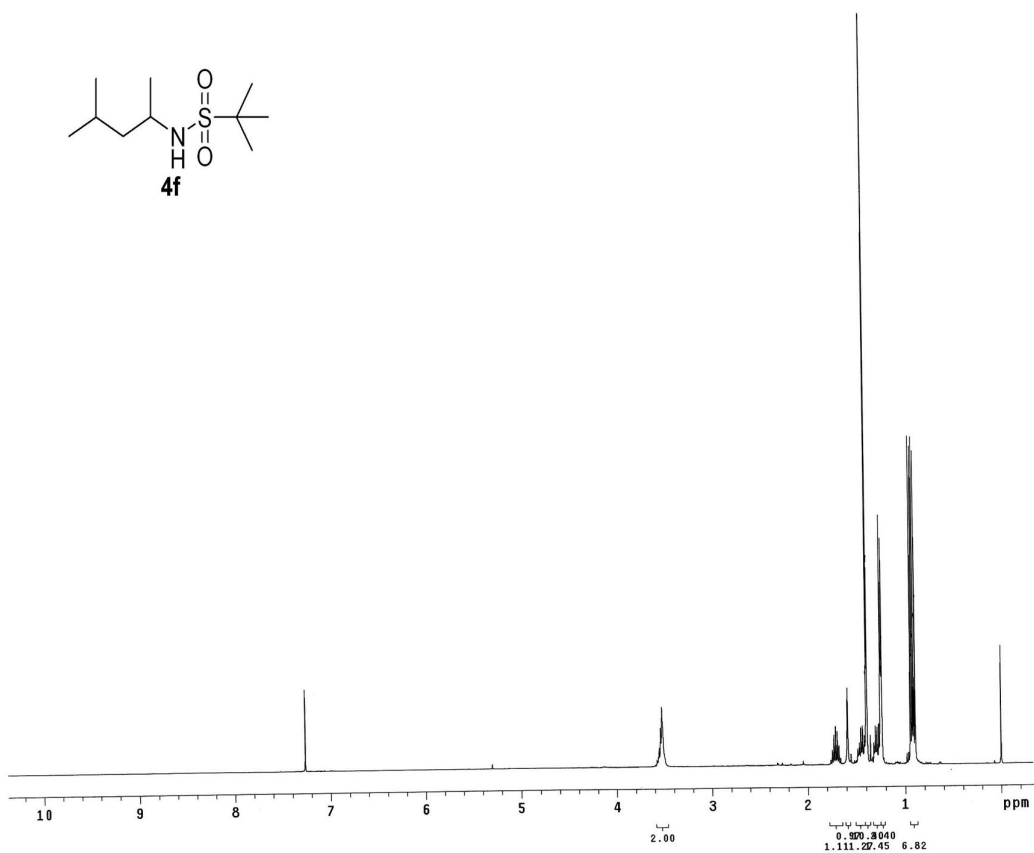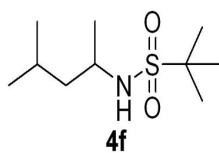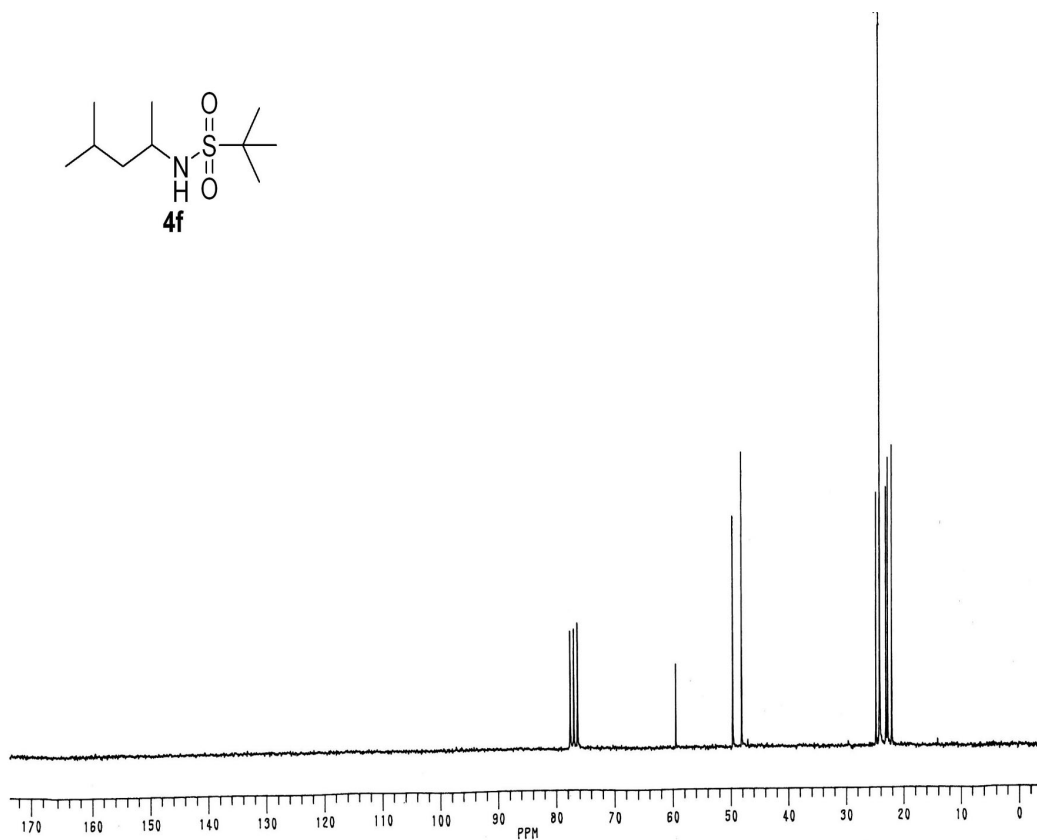

Supplement: Supplementary file 1 [file 5079763]
